# Supplementary material for: Porous single-crystalline vanadium nitride octahedra with a unique electrocatalytic performance
Source: Royal Society of Chemistry journal article supplement (doi:10.1039/d1nj05504f), 2021-12-11
Supplement: d1nj05504f1.pdf [file d1nj05504f1.pdf]

Electronic Supplementary Material (ESI) for New Journal of Chemistry.

## **Porous Single-Crystalline Vanadium Nitride Octahedron with Unique Electrocatalytic Performance**

Xiaoyan Yu,<sup>a,b</sup> Fangyuan Cheng,<sup>b,c</sup> and Kui Xie,<sup>\*b,c,d</sup>

<sup>a</sup>*College of Chemistry and Materials Science, Fujian Normal University, Fuzhou 350007, China*

<sup>b</sup>*Key Laboratory of Optoelectronic Materials Chemistry and Physics, Fujian Institute of Research on the Structure of Matter, Chinese Academy of Sciences, Fuzhou, Fujian 350002, China.*

<sup>c</sup>*Fujian Science & Technology Innovation Laboratory for Optoelectronic Information of China, Fuzhou, Fujian 350108, China.*

<sup>d</sup>*Advanced Energy Science and Technology Guangdong Laboratory, 29 Sanxin North Road, Huizhou, Guangdong 116023, China.*

*\*Correspondence: [kxie@fjirsm.ac.cn](mailto:kxie@fjirsm.ac.cn)*

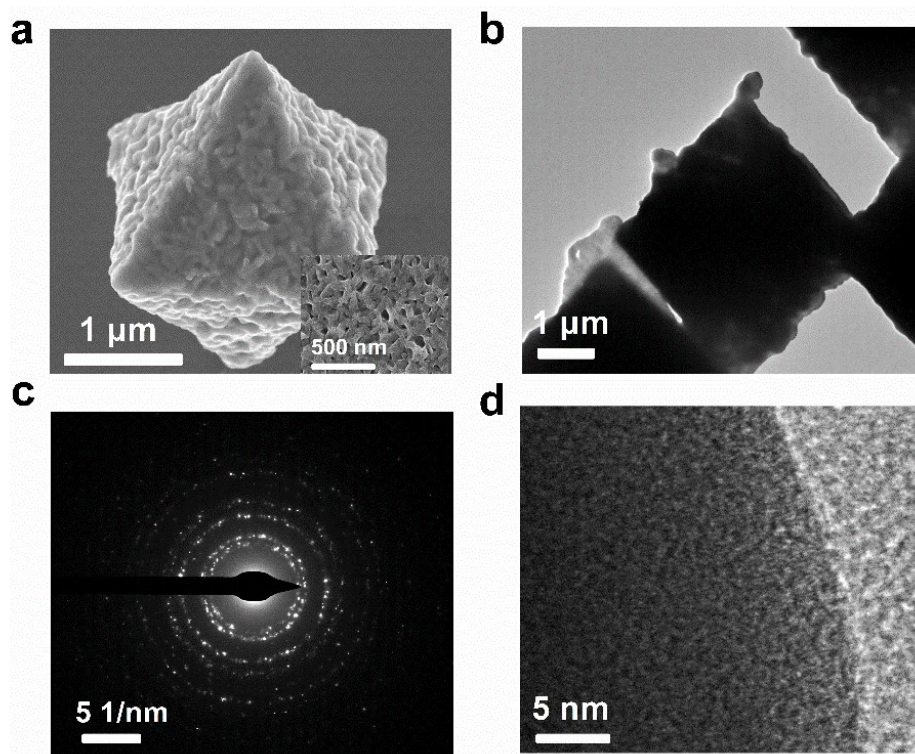

Figure S1. (a) SEM image; (b) TEM image; (c) SAED pattern and (d) Cs-corrected HRTEM image of PPC-VN.

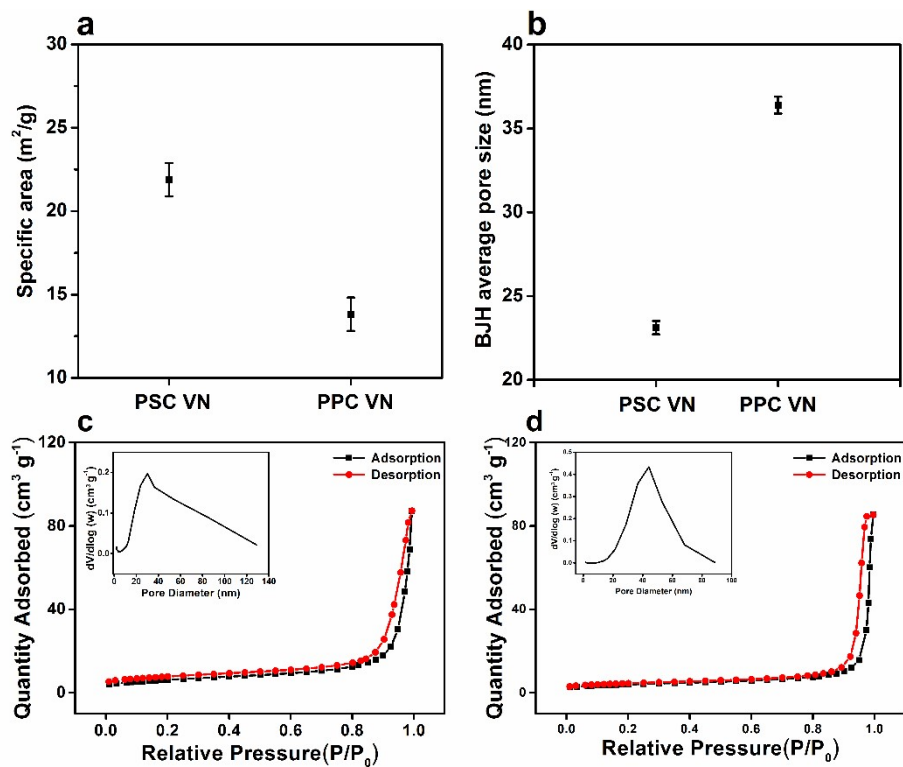

Figure S2. (a, b) The surface specific area and BJH average pore size of PSC-VN and PPC-VN. N<sub>2</sub> adsorption-desorption isotherms and (inset) the corresponding pore diameter distribution of porous single crystal micron particles, (c) PSC-VN (d) PPC-VN.

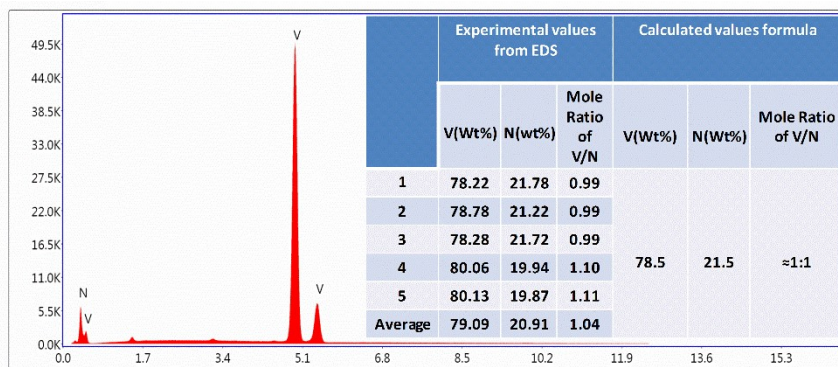

Figure S3. The element analysis of PSC-VN. No oxygen residual is observed from EDS elemental analysis. The mole ratio between V and N is approximately at 1.

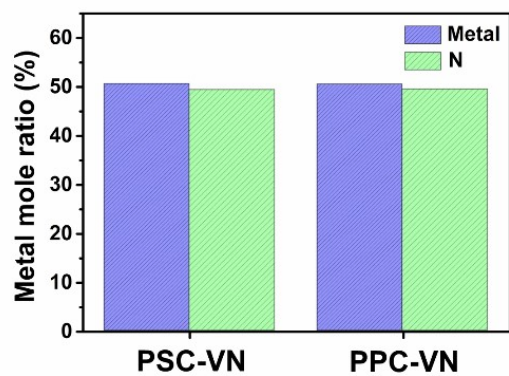

Figure S4. ICP and CA results. Mole ratio between metal and nitrogen in PSC-VN and PPC-VN.

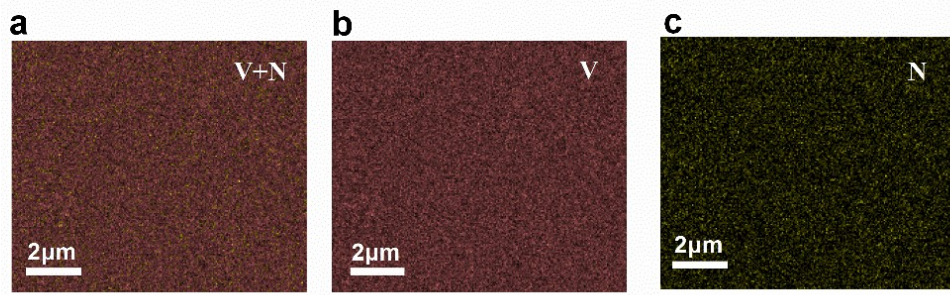

Figure S5. EDS mapping images of VN.

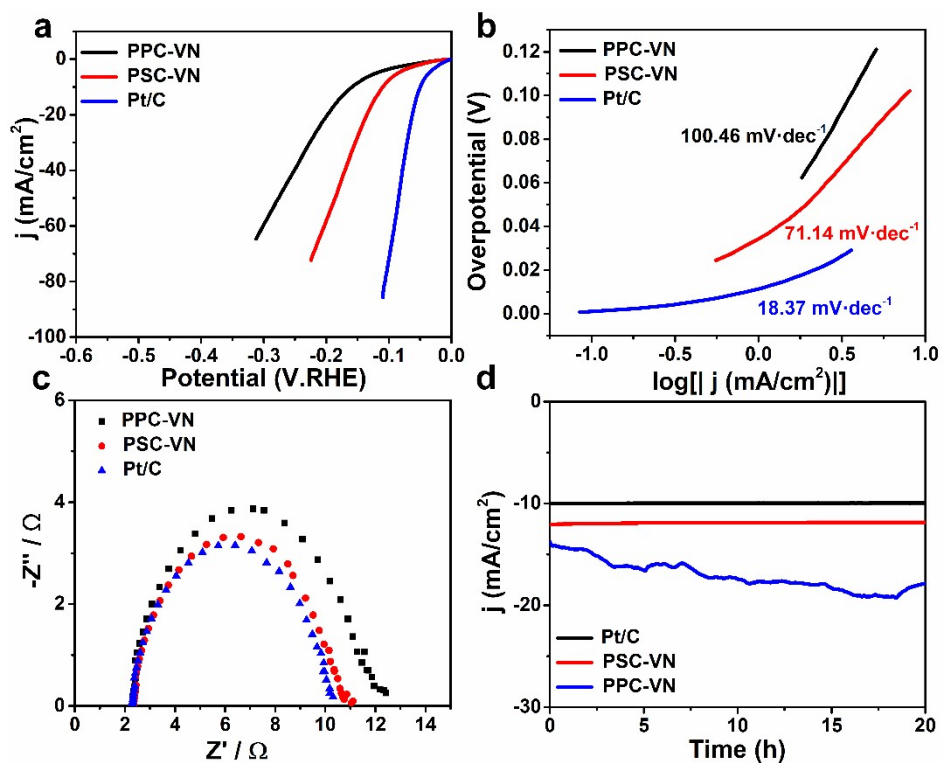

Figure S6. Pt/C (20 wt%), PSC-VN and PPC-VN catalysts toward HER. (a) LSV curves in 0.5 mol·L<sup>-1</sup> H<sub>2</sub>SO<sub>4</sub> solution with a scan rate of 10 mV/s; (b) Tafel plots and (c) the EIS Nyquist plots; (d) Long-standing tolerance test of the Pt/C (20%) at -0.05 V vs. RHE, PSC-VN at -0.1 V vs. RHE and PPC-VN catalysts at -0.2 V vs. RHE for 20 h in 0.5 mol·L<sup>-1</sup> H<sub>2</sub>SO<sub>4</sub> solution.

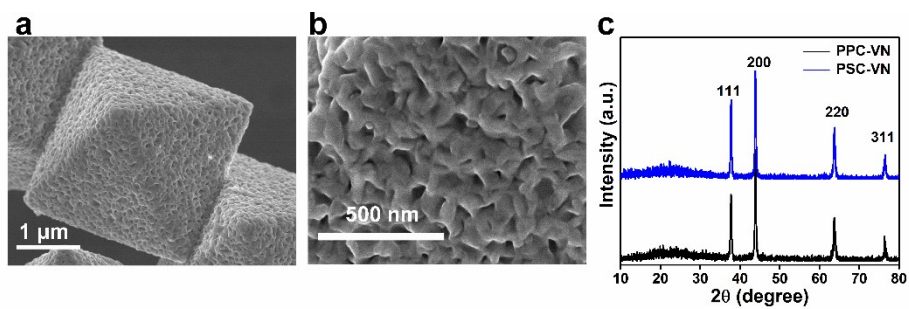

Figure S7. Crystal structure after stability test. (a, b) SEM image of the catalyst after the stability test; (c) The XRD of the catalysts after the stability test.



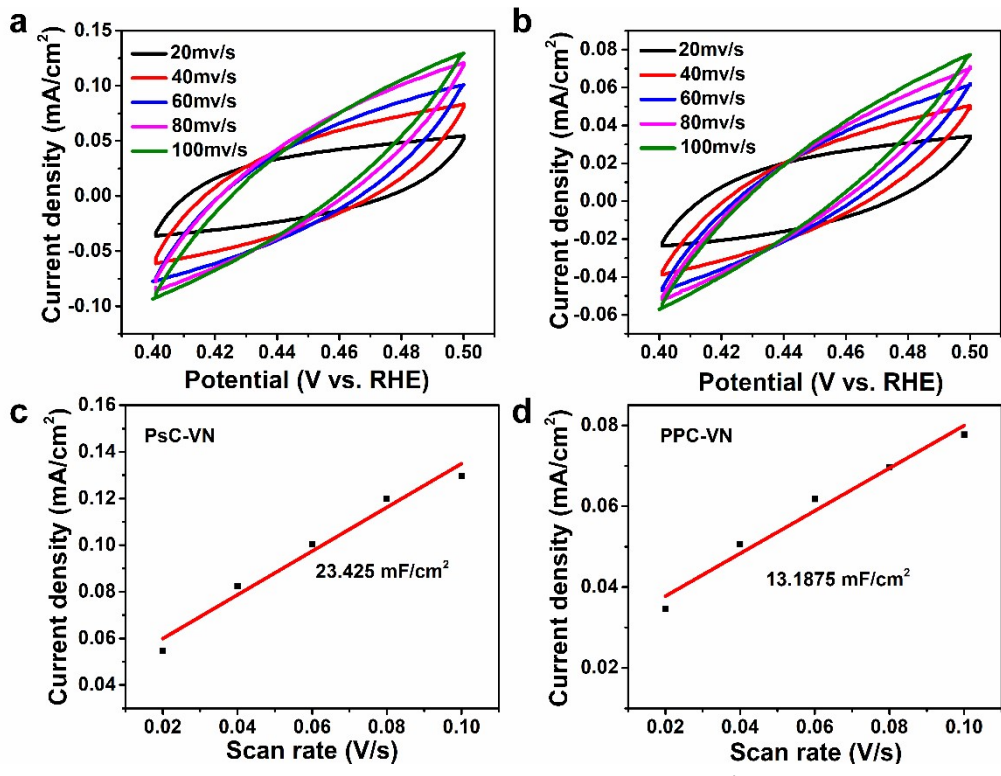

Figure S8. CVs of (a) PSC-VN and (b) PPC-VN octahedron catalysts at 20-100 mV/s in 1.0 mol·L<sup>-1</sup> KOH solution; (c-d) Plots providing the  $C_{dl}$  value of PSC-VN and PPC-VN catalysts, respectively.

Table S1. The summary of the performance of difference catalysts for HER

| Catalyst                   | $\eta$ (mV)at<br>$j=10\text{mA}\cdot\text{cm}^{-2}$ | Tafel slope<br>( $\text{mV}\cdot\text{dec}^{-1}$ ) | Electrolyte                          | References |
|----------------------------|-----------------------------------------------------|----------------------------------------------------|--------------------------------------|------------|
| VN PSC                     | 74.67                                               | 68.30                                              | 1M KOH                               | This work  |
| VN PPC                     | 150.66                                              | 178.52                                             | 1M KOH                               | This work  |
| Ni <sub>3</sub> N@VN-NF    | 56                                                  | 47                                                 | 1M KOH                               | [1]        |
| Co/VN                      | 92                                                  | 54.29                                              | 1M KOH                               | [2]        |
| Mo/VN                      | 108                                                 | 60                                                 | 1M KOH                               | [3]        |
| VN@Ni <sub>3</sub> N-Ni/CC | 57                                                  | 40                                                 | 1M KOH                               | [4]        |
| Co/N-CNT/VN                | 63.4                                                | 62                                                 | 1M KOH                               | [5]        |
| Ru/VN                      | 134                                                 | 35                                                 | 0.5 M H <sub>2</sub> SO <sub>4</sub> | [6]        |
| Ru/VN                      | 144                                                 | 73                                                 | 1M KOH                               | [6]        |
| Co/VN@NC                   | 96                                                  | 82                                                 | 1M KOH                               | [7]        |
| MoS <sub>2</sub> /VN       | 85                                                  | 53.31                                              | 0.5 M H <sub>2</sub> SO <sub>4</sub> | [8]        |
| VN/Co@NCNT                 | 180                                                 | 80.9                                               | 1M KOH                               | [9]        |
| VN/Co/P                    | 137                                                 | 81                                                 | 1 M KOH                              | [10]       |

#### References

1. P. Zhou, D. Xing, Y. Liu, Z. Wang, P. Wang, Z. Zheng, X. Qin, X. Zhang, Y. Dai and B. Huang, *J. Mater. Chem. A*, 2019, **7**, 5513-5521.
2. Y. Xiao, C. Tian, M. Tian, A. Wu, H. Yan, C. Chen, L. Wang, Y. Jiao and H. Fu, *Sci. China Mater*, 2017, **61**, 80-90.
3. B. Wei, G. Tang, H. Liang, Z. Qi, D. Zhang, W. Hu, H. Shen and Z. Wang, *Electrochem. Commun.*, 2018, **93**, 166-170.
4. X. Dong, H. Yan, Y. Jiao, D. Guo, A. Wu, G. Yang, X. Shi, C. Tian and H. Fu, *J. Mater. Chem. A*, 2019, **7**, 15823-15830.
5. C. Huang, D. Wu, P. Qin, K. Ding, C. Pi, Q. Ruan, H. Song, B. Gao, H. Chen and P. K. Chu, *Nano Energy*, 2020, **73**.
6. W. Wang, Y. Shao, Z. Wang, Z. Yang, Z. Zhen, Z. Zhang, C. Mao, X. Guo and G. Li, *ChemElectroChem*, 2020, **7**, 1201-1206.
7. T. Cen, L. Qiu, Z. Ye, X. Peng, Y. Liu and D. Yuan, *Int. J. Hydrogen Energy*, 2021, **46**, 3337-3345.
8. K. Meng, S. Wen, L. Liu, Z. Jia, Y. Wang, Z. Shao and T. Qi, *ACS Appl. Energy Mater*, 2019, **2**, 2854-2861.
9. L. Feng, L. Feng, J. Huang, L. Cao and K. Kajiyoshi, *J. Alloys Compd*, 2021, **853**.
10. H. Yang, Y. Hu, D. Huang, T. Xiong, M. Li, M. S. Balogun and Y. Tong, *Mater. Today Chem*, 2019, **11**, 1-7.
